# Supplementary material for: Stigma toward individuals with mental disorders among Brazilian psychiatrists: a latent class analysis
Source: PubMed Central journal article supplement — Braz J Psychiatry. 2020 Jul 27;43(3):262–8. doi: 10.1590/1516-4446-2020-0864 (PMC8136401; doi:10.1590/1516-4446-2020-0864), 2020-07-27
Supplement: bjp-43-03-262-s001.pdf [file bjp-43-03-262-s001.pdf]

**Table S1** Comparison of sociodemographic, professional, and clinical variables between the two highest stigma groups for schizophrenia and ADHD

| Variable                                | Highest stigma - ADHD (n=174) | Highest stigma - schizophrenia (n=202) | p-value |
|-----------------------------------------|-------------------------------|----------------------------------------|---------|
| <b>Sociodemographics</b>                |                               |                                        |         |
| Sex                                     |                               |                                        |         |
| Female                                  | 75 (43.1)                     | 88 (43.8)                              | 0.89    |
| Male                                    | 99 (56.9)                     | 113 (56.2)                             |         |
| Age, median (IQI)                       | 40 (34/52)                    | 41 (34/54)                             | 0.48*   |
| Marital status                          |                               |                                        |         |
| Married                                 | 114 (65.9)                    | 140 (69.3)                             | 0.48    |
| Not married                             | 59 (34.1)                     | 62 (30.7)                              |         |
| Religion                                |                               |                                        |         |
| Yes                                     | 130 (74.7)                    | 143 (70.8)                             | 0.39    |
| No                                      | 44 (25.3)                     | 59 (29.2)                              |         |
| <b>Professional</b>                     |                               |                                        |         |
| Years since graduation, median (IQI)    | 14 (7/27)                     | 15 (8/30)                              | 0.31*   |
| Graduate level education                |                               |                                        |         |
| Yes (MSc and/or PhD)                    | 36 (20.7)                     | 56 (27.7)                              | 0.11    |
| No                                      | 138 (79.3)                    | 146 (72.3)                             |         |
| Work, predominantly                     |                               |                                        |         |
| Private                                 | 118 (67.8)                    | 148 (73.3)                             | 0.25    |
| Public                                  | 56 (32.2)                     | 54 (26.7)                              |         |
| Teaching activities <sup>†</sup>        |                               |                                        |         |
| Yes                                     | 96 (55.5)                     | 115 (57.2)                             | 0.74    |
| No                                      | 77 (44.5)                     | 86 (42.8)                              |         |
| <b>Clinical</b>                         |                               |                                        |         |
| STAI-Trait total scores, median (IQI)   | 34 (29/40)                    | 35 (29/40)                             | 0.89*   |
| PANAS positive, mean (SD)               | 34.4 (6.2)                    | 33.8 (6.2)                             | 0.29    |
| PANAS negative, median (IQI)            | 17 (14/20)                    | 16 (14/21)                             | 0.49*   |
| Big Five Inventory, mean (SD)           |                               |                                        |         |
| Openness                                | 3.7 (3.1/4.2)                 | 3.6 (0.6)                              | 0.44    |
| Conscientiousness                       | 3.7 (0.6)                     | 3.6 (0.6)                              | 0.29    |
| Extroversion                            | 3.2 (0.7)                     | 3.3 (0.8)                              | 0.60    |
| Agreeableness                           | 3.8 (0.5)                     | 3.8 (0.5)                              | 0.43    |
| Neuroticism                             | 2.5 (0.7)                     | 2.4 (0.7)                              | 0.87    |
| Family history of psychiatric treatment |                               |                                        |         |
| Yes                                     | 117 (68)                      | 136 (67.7)                             | 0.94    |
| No                                      | 55 (32)                       | 65 (32.3)                              |         |

Data presented as n (%), unless otherwise specified.

IQI = interquartile interval; PANAS = Positive and Negative Affect Schedule; SD = standard deviation; STAI = State-Trait Anxiety Inventory - Trait subscale.

\* Mann-Whitney *U* test.

<sup>†</sup> Undergraduate or graduate.
